# Supplementary material for: The effects of Bifidobacterium animalis ssp. lactis B94 on gastrointestinal wellness in adults with Prader–Willi syndrome: study protocol for a randomized controlled trial
Source: Trials. 2018 Apr 27;19:256. doi: 10.1186/s13063-018-2648-x (PMC5921784; doi:10.1186/s13063-018-2648-x)
Supplement: Supplementary file 2 — World Health Organization Trial Registration Data Set. (PDF 98 kb) [file 13063_2018_2648_MOESM2_ESM.pdf]

| Data category                                 | Information                                                                                                                                                                                                                                                                                                                                                                                                                                                                                                          |
|-----------------------------------------------|----------------------------------------------------------------------------------------------------------------------------------------------------------------------------------------------------------------------------------------------------------------------------------------------------------------------------------------------------------------------------------------------------------------------------------------------------------------------------------------------------------------------|
| Primary registry and trial identifying number | ClinicalTrials.gov<br>NCT03277157                                                                                                                                                                                                                                                                                                                                                                                                                                                                                    |
| Date of registration in primary registry      | 8 September 2017                                                                                                                                                                                                                                                                                                                                                                                                                                                                                                     |
| Secondary identifying numbers                 | IRB201701976                                                                                                                                                                                                                                                                                                                                                                                                                                                                                                         |
| Source(s) of monetary or material support     | Lallemand Health Solutions Inc.                                                                                                                                                                                                                                                                                                                                                                                                                                                                                      |
| Primary sponsor                               | University of Florida                                                                                                                                                                                                                                                                                                                                                                                                                                                                                                |
| Secondary sponsor(s)                          | N/A                                                                                                                                                                                                                                                                                                                                                                                                                                                                                                                  |
| Contact for public queries                    | WD <a href="mailto:wdahl@ufl.edu">wdahl@ufl.edu</a>                                                                                                                                                                                                                                                                                                                                                                                                                                                                  |
| Contact for scientific queries                | WD<br>University of Florida, Gainesville FL USA                                                                                                                                                                                                                                                                                                                                                                                                                                                                      |
| Public title                                  | B. lactis B94 effects on gastrointestinal function.                                                                                                                                                                                                                                                                                                                                                                                                                                                                  |
| Scientific title                              | The effects of <i>Bifidobacterium animalis ssp. lactis</i> B94 on gastrointestinal function in adults with Prader-Willi syndrome: A randomized, double-blind study.                                                                                                                                                                                                                                                                                                                                                  |
| Countries of recruitment                      | United States                                                                                                                                                                                                                                                                                                                                                                                                                                                                                                        |
| Health condition(s) or problem(s) studied     | Gastrointestinal wellness and function                                                                                                                                                                                                                                                                                                                                                                                                                                                                               |
| Intervention(s)                               | Active comparator: <i>Bifidobacterium animalis ssp lactis</i> B94<br>Placebo comparator: potato starch and magnesium stearate                                                                                                                                                                                                                                                                                                                                                                                        |
| Key inclusion and exclusion criteria          | Ages eligible for study: 18-75 years<br>Sexes eligible for study: both<br>Accepts healthy volunteers: no                                                                                                                                                                                                                                                                                                                                                                                                             |
|                                               | Inclusion criteria: adults with Prader Willi Syndrome (18-75 years)<br>Exclusion criteria: milk protein allergy, currently taking medications for diarrhea, currently taking probiotics supplements and do not want to discontinue prior to the start of the baseline period (i.e. those that discontinue will be included), and previously or are currently being treated for gastrointestinal diseases including: gastric ulcers, Crohn's disease, celiac disease, ulcerative colitis, or gastrointestinal cancer. |
| Study type                                    | Interventional                                                                                                                                                                                                                                                                                                                                                                                                                                                                                                       |
|                                               | Allocation: randomized intervention model. Crossover assignment masking: double blind (subject, caregiver, investigator, outcomes assessor)                                                                                                                                                                                                                                                                                                                                                                          |
|                                               | Primary purpose: gastrointestinal function                                                                                                                                                                                                                                                                                                                                                                                                                                                                           |
|                                               | N/A                                                                                                                                                                                                                                                                                                                                                                                                                                                                                                                  |

|                         |                                                                                                                                                                                                                                                                    |
|-------------------------|--------------------------------------------------------------------------------------------------------------------------------------------------------------------------------------------------------------------------------------------------------------------|
| Data category           | Information                                                                                                                                                                                                                                                        |
| Date of first enrolment | Pending                                                                                                                                                                                                                                                            |
| Target sample size      | 36                                                                                                                                                                                                                                                                 |
| Recruitment status      | Recruiting                                                                                                                                                                                                                                                         |
| Primary outcome(s)      | weekly stool frequency (difference between treatments)                                                                                                                                                                                                             |
| Key secondary outcomes  | weekly stool frequency (percentage change from baseline), stool form (percentage change in slow transit Bristol Stool Form Scale 1 and 2 from baseline and between treatments), gastrointestinal symptoms (difference between treatments and change from baseline) |
